# Supplementary material for: Complete Mitochondrial Genome of Scolytoplatypodini Species (Coleoptera: Curculionidae: Scolytinae) and Phylogenetic Implications
Source: MDPI journal article supplement (doi:10.3390/genes14010162), 2023-01-06
Supplement: s1 [file s1]

Supplementary Data:

Table S1. The best-fit partitioning scheme and corresponding models used on the phylogenetic tree.

| Partition names                                                                                                                                                                                                                                    | Sites | Best Model |
|----------------------------------------------------------------------------------------------------------------------------------------------------------------------------------------------------------------------------------------------------|-------|------------|
| charset Subset1 = 2344-3021\3, 1-666\3, 3022-3801\3, 3802-4932\3 ( <i>cox2</i> codon1, <i>atp6</i> codon1, <i>cox3</i> codon1, <i>cytb</i> codon1)                                                                                                 | 1085  | GTR+I+G    |
| charset Subset2 = 818-2343\3, 2345-3021\3, 3023-3801\3, 3803-4932\3, 2-666\3 ( <i>cox1</i> codon2, <i>cox2</i> codon2, <i>cox3</i> codon2, <i>cytb</i> codon2, <i>atp6</i> codon2)                                                                 | 1594  | TVM+I+G    |
| charset Subset3 = 6828-7170\3, 3-666\3, 819-2343\3, 3804-4932\3, 669-816\3, 2346-3021\3, 3024-3801\3 ( <i>nad3</i> codon3, <i>atp6</i> codon3, <i>cox1</i> codon3, <i>cytb</i> codon3, <i>atp8</i> codon3, <i>cox2</i> codon3, <i>cox3</i> codon3) | 1759  | GTR+G      |
| charset Subset4 = 6826-7170\3, 5869-6825\3, 10405-10875\3, 668-816\3, 667-816\3 ( <i>nad3</i> codon1, <i>nad2</i> codon1, <i>nad6</i> codon1, <i>atp8</i> codon2, <i>atp8</i> codon1)                                                              | 691   | GTR+I+G    |
| charset Subset5 = 817-2343\3 ( <i>cox1</i> codon1)                                                                                                                                                                                                 | 509   | GTR+I+G    |
| charset Subset6 = 4933-5868\3, 7171-7449\3, 8758-10404\3, 7450-8757\3 ( <i>nad1</i> codon1, <i>nad4L</i> codon1, <i>nad5</i> codon1, <i>nad4</i> codon1)                                                                                           | 1390  | GTR+I+G    |
| charset Subset7 = 7451-8757\3, 4934-5868\3, 7172-7449\3, 8759-10404\3 ( <i>nad4</i> codon2, <i>nad1</i> codon2, <i>nad4L</i> codon2, <i>nad5</i> codon2)                                                                                           | 1390  | GTR+I+G    |
| charset Subset8 = 7452-8757\3, 8760-10404\3, 4935-5868\3, 7173-7449\3 ( <i>nad4</i> codon3, <i>nad5</i> codon3, <i>nad1</i> codon3, <i>nad4L</i> codon3)                                                                                           | 1390  | TRN+G      |
| charset Subset9 = 10406-10875\3, 5870-6825\3, 6827-7170\3 ( <i>nad6</i> codon2, <i>nad2</i> codon2, <i>nad3</i> codon2)                                                                                                                            | 591   | TVM+I+G    |
| charset Subset10 = 10407-10875\3, 5871-6825\3 ( <i>nad6</i> codon3, <i>nad2</i> codon3)                                                                                                                                                            | 476   | TRN+G      |

Table S2. Nucleotide compositions in regions of the *S. raja*, *S. sinensis*, *S. skyliuae*, and *S. wugongshanensis* mitochondrial genomes.

| Species                   | Gene Region      | Size (bp) | A(%) | T(%) | C(%) | G(%) | A+T(%) | G+C(%) | AT-Skew | GC-Skew |
|---------------------------|------------------|-----------|------|------|------|------|--------|--------|---------|---------|
| <i>S. raja</i>            | Whole mitogenome | 15324     | 39.4 | 36.4 | 14.8 | 9.4  | 75.8   | 24.2   | 0.04    | -0.22   |
|                           | 13PCGs           | 11070     | 31.9 | 41.8 | 13.7 | 12.6 | 73.7   | 26.3   | -0.13   | -0.04   |
|                           | 1st codon        | 3690      | 34.5 | 33.6 | 14.2 | 17.7 | 68.1   | 31.9   | 0.01    | 0.11    |
|                           | 2st codon        | 3690      | 20.8 | 48.4 | 17.1 | 13.7 | 69.2   | 30.8   | -0.40   | -0.11   |
|                           | 3st codon        | 3690      | 40.3 | 43.5 | 9.9  | 6.3  | 83.8   | 16.2   | -0.04   | -0.22   |
|                           | tRNA genes       | 1437      | 40.8 | 39.5 | 8.1  | 11.6 | 80.3   | 19.7   | 0.02    | 0.18    |
|                           | rRNA genes       | 2065      | 38.9 | 42.6 | 5.9  | 12.6 | 81.5   | 18.5   | -0.05   | 0.36    |
|                           | D-loop           | 586       | 43.5 | 37.7 | 13.3 | 5.5  | 81.2   | 18.8   | 0.07    | -0.41   |
| <i>S. sinensis</i>        | Whole mitogenome | 15394     | 39.5 | 36.3 | 15.0 | 9.2  | 75.8   | 24.2   | 0.04    | -0.24   |
|                           | 13PCGs           | 11062     | 31.6 | 42.0 | 13.7 | 12.7 | 73.6   | 26.4   | -0.14   | -0.04   |
|                           | 1st codon        | 3688      | 34.3 | 34.2 | 13.8 | 17.7 | 68.5   | 31.5   | 0.00    | 0.12    |
|                           | 2st codon        | 3687      | 20.8 | 48.3 | 17.1 | 13.8 | 69.1   | 30.9   | -0.40   | -0.11   |
|                           | 3st codon        | 3687      | 39.7 | 43.5 | 10.2 | 6.6  | 83.2   | 16.8   | -0.05   | -0.21   |
|                           | tRNA genes       | 1445      | 41.1 | 39.0 | 8.6  | 11.3 | 80.1   | 19.9   | 0.03    | 0.14    |
|                           | rRNA genes       | 2073      | 38.3 | 42.6 | 6.1  | 13.0 | 80.9   | 19.1   | -0.05   | 0.36    |
|                           | D-loop           | 621       | 47.0 | 38.3 | 11.5 | 3.2  | 85.3   | 14.7   | 0.10    | -0.56   |
| <i>S. skyliuae</i>        | Whole mitogenome | 15167     | 39.6 | 36.7 | 15.5 | 8.2  | 76.3   | 23.7   | 0.04    | -0.31   |
|                           | 13PCGs           | 11023     | 32.3 | 42.2 | 13.6 | 11.9 | 74.5   | 25.5   | -0.13   | -0.07   |
|                           | 1st codon        | 3675      | 35.8 | 34.3 | 13.5 | 16.4 | 70.1   | 29.9   | 0.02    | 0.10    |
|                           | 2st codon        | 3674      | 20.6 | 48.3 | 17.3 | 13.8 | 68.9   | 31.1   | -0.40   | -0.11   |
|                           | 3st codon        | 3674      | 40.5 | 44.1 | 9.8  | 5.6  | 84.6   | 15.4   | -0.04   | -0.27   |
|                           | tRNA genes       | 1424      | 41.7 | 39.7 | 8.2  | 10.4 | 81.4   | 18.6   | 0.02    | 0.12    |
|                           | rRNA genes       | 2056      | 38.6 | 41.7 | 5.5  | 14.2 | 80.3   | 19.7   | -0.04   | 0.44    |
|                           | D-loop           | 495       | 44.4 | 37.4 | 15.4 | 2.8  | 81.8   | 18.2   | 0.09    | -0.69   |
| <i>S. wugongshanensis</i> | Whole mitogenome | 15267     | 39.0 | 37.2 | 15.6 | 8.2  | 76.2   | 23.8   | 0.02    | -0.31   |
|                           | 13PCGs           | 11025     | 32.0 | 42.3 | 13.7 | 12.0 | 74.3   | 25.7   | -0.14   | -0.07   |
|                           | 1st codon        | 3675      | 35.1 | 35.3 | 12.8 | 16.8 | 70.4   | 29.6   | 0.00    | 0.14    |
|                           | 2st codon        | 3675      | 20.8 | 48.9 | 16.7 | 13.6 | 69.7   | 30.3   | -0.40   | -0.10   |
|                           | 3st codon        | 3675      | 40.1 | 42.9 | 11.3 | 5.7  | 83.0   | 17.0   | -0.03   | -0.33   |
|                           | tRNA genes       | 1413      | 41.8 | 39.1 | 8.5  | 10.6 | 80.9   | 19.1   | 0.03    | 0.11    |
|                           | rRNA genes       | 2044      | 39.4 | 41.1 | 5.5  | 14.0 | 80.5   | 19.5   | -0.02   | 0.44    |
|                           | D-loop           | 670       | 42.5 | 40.6 | 13.8 | 3.1  | 83.1   | 16.9   | 0.02    | -0.63   |

Table S3. Mitogenomic characteristics of *S. raja*/*S. sinensis*/*S. skyliuae*/*S. wugongshanensis*.

| Gene         | Strand | Position            |                     | Codons          |                 | Anticodon | Size (bp)           | IGN         |
|--------------|--------|---------------------|---------------------|-----------------|-----------------|-----------|---------------------|-------------|
|              |        | From                | To                  | Start           | Stop            |           |                     |             |
| <i>trnI</i>  | J      | 1/1/1               | 67/67/66/65         |                 |                 | ACT       | 67/67/66/65         | 0/0/0       |
| <i>trnQ</i>  | N      | 68/64/94/77         | 138/137/161/144     |                 |                 | CAA       | 71/71/68/68         | 0/4/27/11   |
| <i>trnM</i>  | J      | 137/133/161/145     | 204/200/228/211     |                 |                 | ATG       | 68/68/68/67         | -2/2/-1/0   |
| <i>nad2</i>  | J      | 205/201/259/212     | 1212/1208/1245/1228 | ATT/ATT/ATA/ATC | TAA/TAA/TAA/TAA |           | 1008/1008/987/1017  | 0/0/30/0    |
| <i>trnW</i>  | J      | 1211/1207/1246/1228 | 1279/1275/1311/1292 |                 |                 | TGA       | 68/69/66/65         | -2/-2/0/-1  |
| <i>trnC</i>  | N      | 1279/1275/1313/1292 | 1341/1338/1377/1358 |                 |                 | TGC       | 63/64/65/67         | -1/-1/1/-1  |
| <i>trnY</i>  | N      | 1342/1339/1378/1359 | 1400/1397/1437/1417 |                 |                 | TAC       | 59/59/60/59         | 0/0/0/0     |
| <i>coxI</i>  | J      | 1411/1413/1440/1453 | 2949/2951/2978/2955 | ATT/ATT/ATT/ATT | TAA/TAA/TAA/TAA |           | 1539/1539/1539/1503 | 10/15/2/35  |
| <i>trnL2</i> | J      | 2956/2963/2992/2963 | 3019/3026/3054/3025 |                 |                 | TTA       | 64/64/63/63         | 6/11/13/7   |
| <i>cox2</i>  | J      | 3020/3027/3055/3026 | 3703/3710/3736/3709 | ATC/ATT/ATT/ATT | TAA/TAA/T--/TAA |           | 684/684/682/684     | 0/0/0/0     |
| <i>trnK</i>  | J      | 3717/3723/3737/3713 | 3785/3791/3804/3782 |                 |                 | AAG       | 69/69/68/70         | 13/12/0/3   |
| <i>trnD</i>  | J      | 3785/3792/3805/3782 | 3847/3854/3867/3844 |                 |                 | GAC       | 63/63/63/63         | 1/0/0/-1    |
| <i>atp8</i>  | J      | 3848/3855/3876/3845 | 4009/4016/4028/4003 | ATC/ATC/ATA/ATC | TAA/TAA/TAA/TAA |           | 162/162/153/159     | 0/0/8/0     |
| <i>atp6</i>  | J      | 4003/4010/4022/3997 | 4669/4676/4688/4663 | GTG/ATG/ATG/ATG | T--/T--/T--/T-- |           | 667/667/667/667     | -7/-7/-7/-7 |
| <i>cox3</i>  | J      | 4670/4677/4689/4664 | 5449/5456/5468/5443 | ATG/ATG/ATG/ATG | TAA/TAG/TAA/TAA |           | 780/780/780/780     | 0/0/0/0     |
| <i>trnG</i>  | J      | 5473/5507/5477/5449 | 5535/5569/5540/5512 |                 |                 | GGA       | 63/63/64/64         | 23/50/8/5   |
| <i>nad3</i>  | J      | 5542/5576/5547/5518 | 5889/5923/5894/5865 | ATT/ATT/ATT/ATT | TAA/TAA/TAA/TAA |           | 348/348/348/348     | 6/6/6/5     |
| <i>trnA</i>  | J      | 5898/5939/5895/5865 | 5961/6003/5958/5926 |                 |                 | GCA       | 64/65/64/62         | 8/15/0/-1   |
| <i>trnN</i>  | J      | 5962/6002/5958/5926 | 6026/6066/6024/5990 |                 |                 | AAC       | 65/65/67/65         | 0/-2/-1/-1  |
| <i>trnR</i>  | J      | 6041/6073/6033/6001 | 6104/6137/6097/6064 |                 |                 | CGA       | 64/65/65/64         | 14/6/8/10   |
| <i>trnS1</i> | J      | 6105/6138/6099/6065 | 6163/6197/6153/6121 |                 |                 | AGA       | 59/60/55/57         | 0/0/1/0     |
| <i>trnE</i>  | J      | 6164/6198/6156/6123 | 6225/6260/6219/6186 |                 |                 | GAA       | 62/63/64/64         | 0/0/2/1     |
| <i>trnF</i>  | N      | 6225/6260/6218/6185 | 6289/6324/6281/6249 |                 |                 | TTC       | 65/65/64/65         | -1/-1/-2/-2 |
| <i>nad5</i>  | N      | 6291/6334/6283/6250 | 8000/8043/7989/7962 | ATT/ATT/ATATATA | TAA/TAG/TAA/TAA |           | 1710/1710/1707/1713 | 1/9/1/0     |
| <i>trnH</i>  | N      | 8001/8044/7990/7963 | 8064/8108/8055/8026 |                 |                 | CAC       | 65/65/66/64         | 0/0/0/0     |

|              |   |                         |                         |                 |                 |     |                     |             |
|--------------|---|-------------------------|-------------------------|-----------------|-----------------|-----|---------------------|-------------|
| <i>nad4</i>  | N | 8069/8112/8055/8026     | 9388/9431/9374/9345     | ATG/ATG/ATG/ATG | TAG/TAG/TAA/TAA |     | 1320/1320/1320/1320 | 4/3/-1/-1   |
| <i>nad4l</i> | N | 9382/9425/9368/9339     | 9672/9751/9658/9629     | ATG/ATG/ATG/ATG | TAA/TAA/TAA/TAA |     | 291/291/291/291     | -7/-7/-7/-7 |
| <i>trnT</i>  | J | 9678/9721/9677/9632     | 9742/9787/9740/9694     |                 |                 | ACA | 65/67/64/63         | 5/5/18/2    |
| <i>trnP</i>  | N | 9743/9788/9741/9695     | 9810/9855/9805/9757     |                 |                 | CCA | 68/68/65/63         | 0/0/0/0     |
| <i>nad6</i>  | J | 9819/9864/9813/9765     | 10322/10367/10313/10262 | ATT/ATA/ATT/ATT | TAA/TAA/TAA/TAA |     | 504/504/501/498     | 8/8/7/7     |
| <i>cob</i>   | J | 10316/10367/10310/10259 | 11437/11479/11425/11371 | ATC/ATG/ATA/ATA | TAA/TAA/TAA/TAA |     | 1122/1113/1116/1113 | -7/-1/-4/-4 |
| <i>trnS2</i> | J | 11465/11505/10430/11376 | 11532/11573/11496/11441 |                 |                 | TCA | 68/69/67/66         | 27/25/4/4   |
| <i>nad1</i>  | N | 11601/11629/11550/11490 | 12536/12564/12482/12422 | TTG/TTG/ATA/ATG | TAA/TAA/TAA/TAA |     | 936/936/933/933     | 68/55/53/48 |
| <i>trnL1</i> | N | 12537/12565/12484/12425 | 12603/12630/12550/12489 |                 |                 | CTA | 67/66/67/65         | 0/0/1/2     |
| <i>rrnL</i>  | N | 12604/12631/12551/12490 | 13915/13943/13850/13779 |                 |                 |     | 1312/1313/1300/1290 | 0/0/0/0     |
| <i>trnV</i>  | N | 13916/13944/13851/13780 | 13985/14013/13915/13843 |                 |                 | GTA | 70/70/65/64         | 0/0/0/0     |
| <i>rrnS</i>  | N | 13986/14014/13916/13844 | 14738/14773/14671/14597 |                 |                 |     | 753/760/756/754     | 0/0/0/0     |
| D-loop       |   | 14739/14774/14672/14598 | 15324/15394/15166/15267 |                 |                 |     | 586/621/495/670     | 0/0/0/0     |

NOTE: N, N-strand; J, J-strand; IGN = intergenic nucleotides; – not determined.

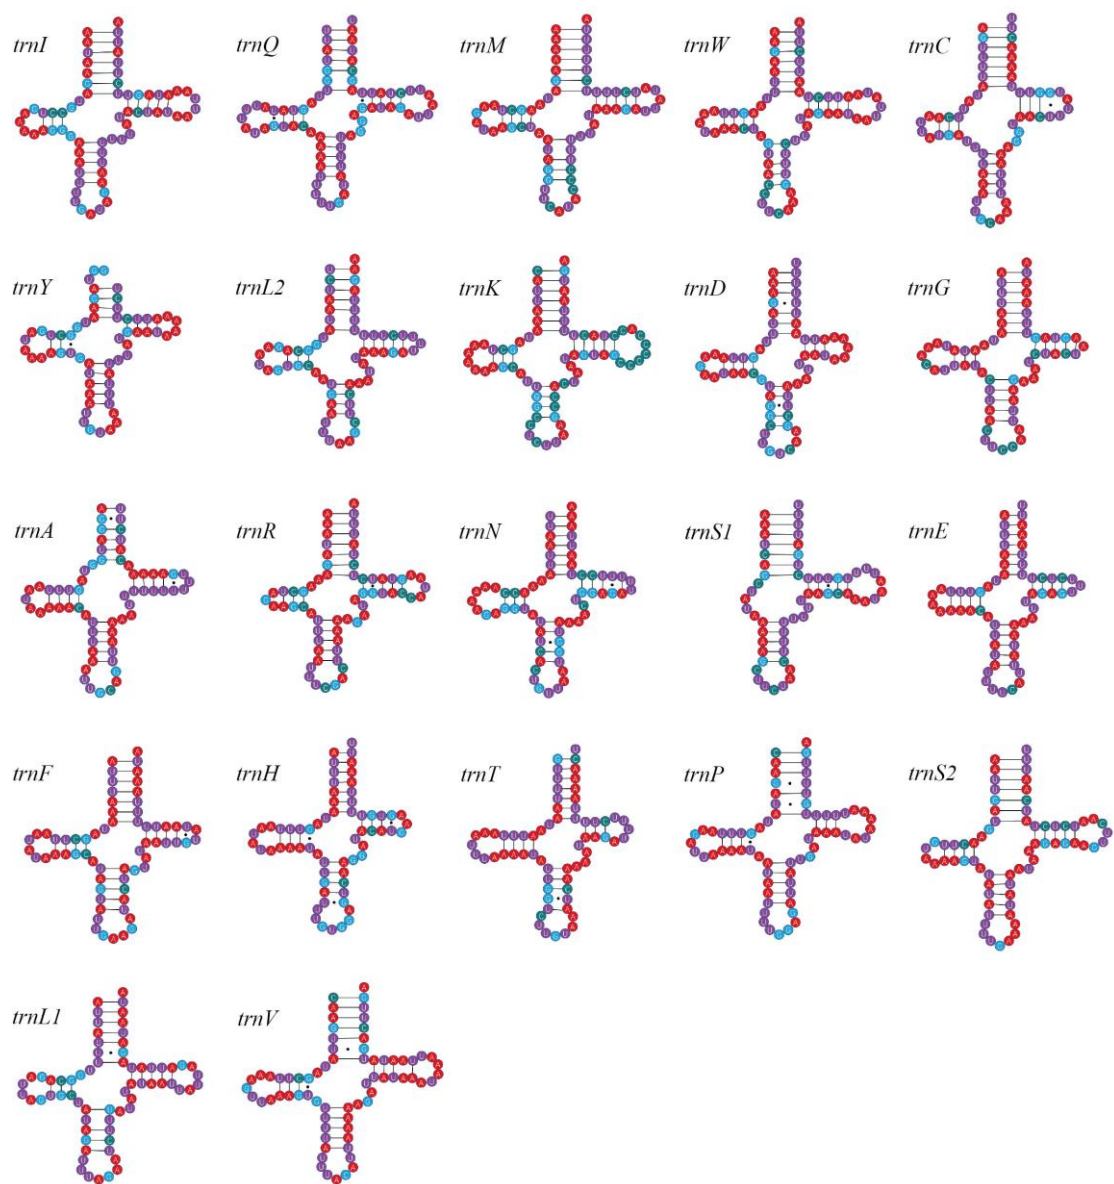

Figure S1. Secondary structures for tRNA genes from the mtDNA of *S. raja*.

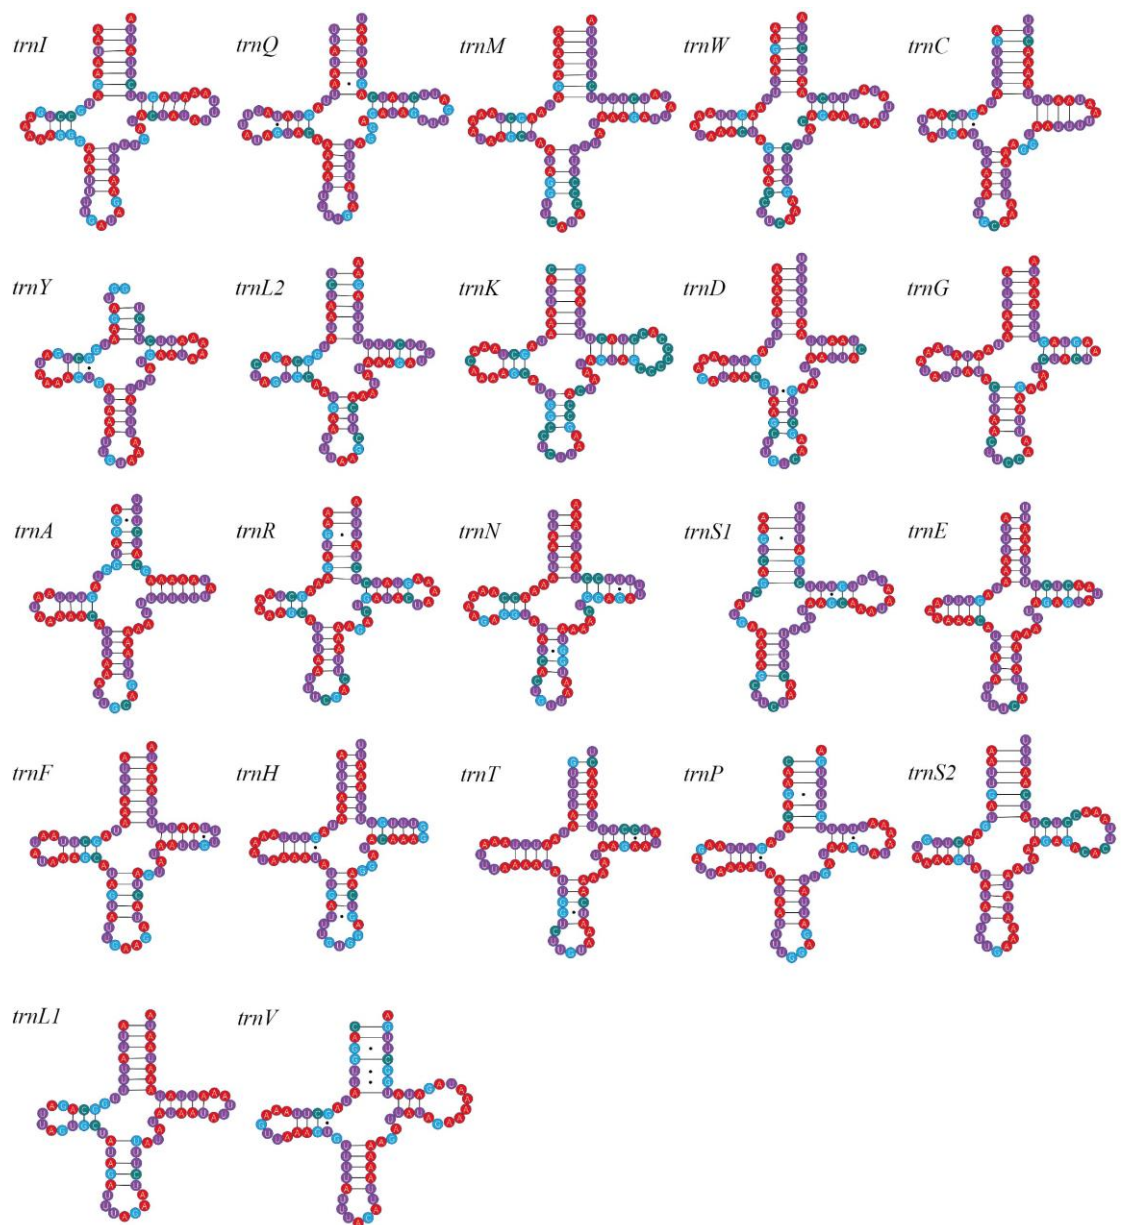

Figure S2. Secondary structures for tRNA genes from the mtDNA of *S. sinensis*.

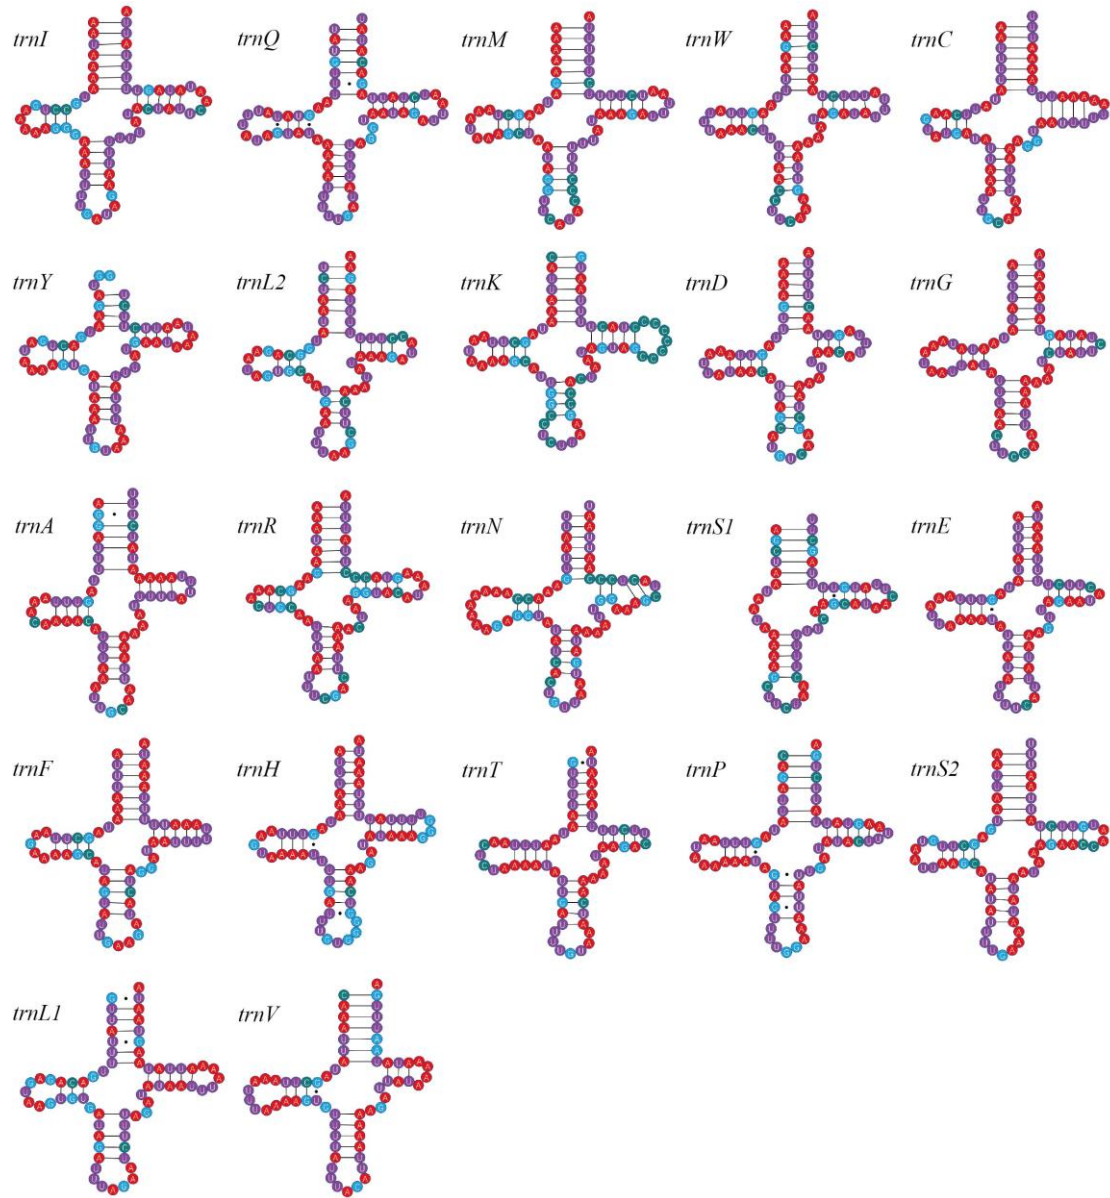

Figure S3. Secondary structures for tRNA genes from the mtDNA of *S. skyliuae*.



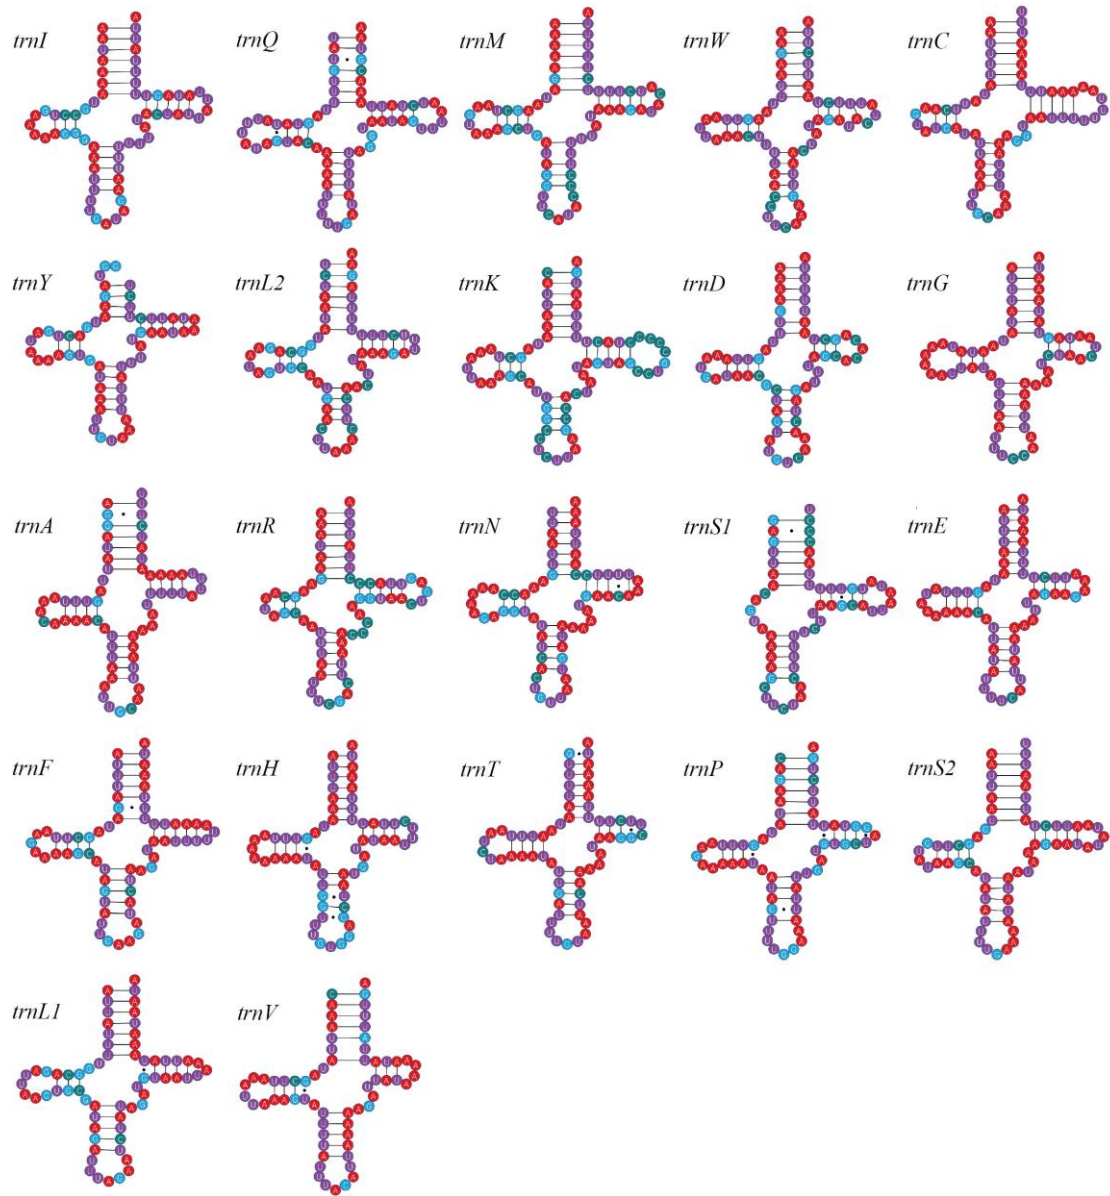

Figure S4. Secondary structures for tRNA genes from the mtDNA of *S. wugongshanensis*.



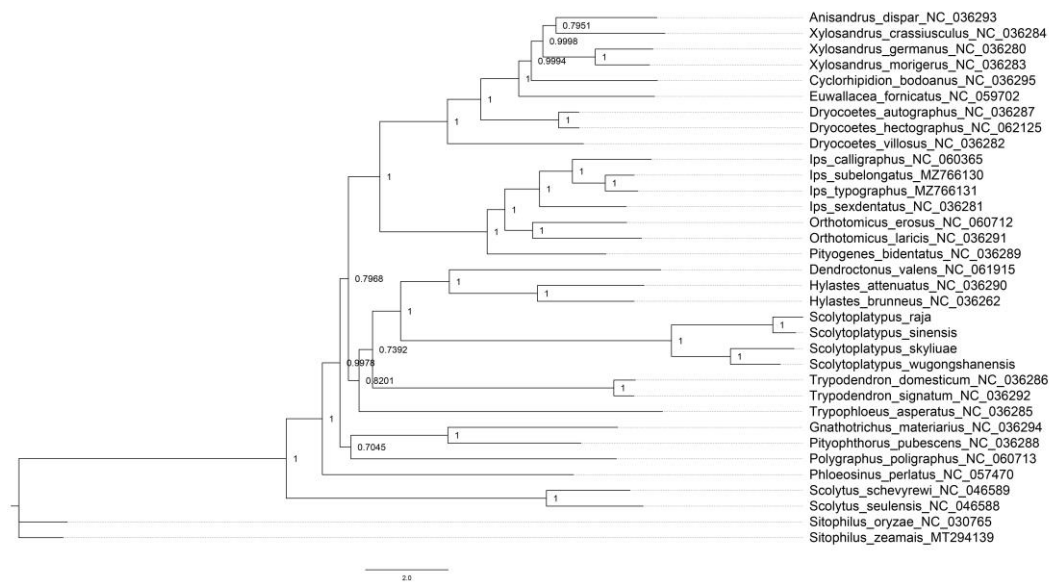

Figure S5. Phylogenetic tree of Scolytinae using the BI method based on 13 PCGs.
